# Supplementary material for: Bennu’s near-Earth lifetime of 1.75 million years inferred from craters on its boulders
Source: Springer Nature journal article supplement (doi:10.1038/s41586-020-2846-z), 2020-10-26
Supplement: 41586_2020_2846_MOESM1_ESM.pdf [file 41586_2020_2846_MOESM1_ESM.pdf]

| Boulder # | Lat (°) | Lon (°) | $R_c$ (m) | $A_B$ (m <sup>2</sup> ) | $R_c/R_T$ |
|-----------|---------|---------|-----------|-------------------------|-----------|
| 1         | -42.5   | 98.6    | 0.62      | 6.57                    | 0.426     |
| 2         | -33.6   | 178     | 0.65      | 7.35                    | 0.425     |
| 3         | 13.3    | 116     | 0.9       | 14.10                   | 0.425     |
| 4         | 3.7     | 170.8   | 1.65      | 100.10                  | 0.310     |
| 5         | -0.49   | 81.7    | 2.5       | 153.00                  | 0.357     |
| 6         | 29.5    | 192     | 0.45      | 6.48                    | 0.314     |
| 7         | 36.1    | 52.4    | 0.68      | 15.10                   | 0.308     |
| 8         | 9.14    | 267     | 1.09      | 42.2                    | 0.296     |
| 9         | -41     | 117     | 0.58      | 12.3                    | 0.293     |
| 10        | -37     | 148     | 0.34      | 4.17                    | 0.293     |
| 11        | -42.4   | 77.3    | 1.42      | 75.5                    | 0.289     |
| 12        | -28.5   | 96.7    | 0.55      | 11.3                    | 0.287     |
| 13        | -54.7   | 148     | 0.39      | 5.91                    | 0.287     |
| 14        | -27.3   | 304     | 0.46      | 8.17                    | 0.282     |
| 15        | -40     | 110     | 0.32      | 4.15                    | 0.281     |
| 16        | -34.7   | 55.5    | 0.97      | 37.2                    | 0.280     |
| 17        | 11.7    | 118     | 0.54      | 11.5                    | 0.280     |
| 18        | -52.4   | 147     | 0.6       | 15.1                    | 0.274     |
| 19        | 22.3    | 298     | 0.46      | 8.8                     | 0.274     |
| 20        | 46.4    | 353     | 0.56      | 14.4                    | 0.259     |
| 21        | -37     | 105     | 0.25      | 3.06                    | 0.257     |
| 22        | -45.4   | 88.8    | 0.25      | 2.95                    | 0.257     |
| 23        | 56.2    | 196     | 1.02      | 52.7                    | 0.249     |
| 24        | 30.2    | 273     | 0.32      | 5.11                    | 0.249     |
| 25        | -15.1   | 241     | 0.55      | 15.2                    | 0.248     |
| 26        | -27.5   | 87.7    | 1.74      | 155                     | 0.247     |
| 27        | -63.1   | 36.1    | 0.25      | 3.26                    | 0.244     |
| 28        | 51.7    | 148     | 0.67      | 24.2                    | 0.241     |
| 29        | 45.3    | 65      | 0.39      | 8.21                    | 0.240     |
| 30        | 11.4    | 76.4    | 0.78      | 33.4                    | 0.239     |
| 31        | -70     | 140     | 0.28      | 4.27                    | 0.236     |
| 32        | 10.7    | 319     | 0.19      | 2.15                    | 0.234     |
| 33        | 11.5    | 24.4    | 0.5       | 14.5                    | 0.233     |
| 34        | -29.9   | 251     | 1.45      | 123                     | 0.232     |
| 35        | 60.5    | 301     | 0.64      | 23.9                    | 0.232     |
| 36        | 22.6    | 294     | 0.85      | 43.5                    | 0.227     |
| 37        | 59.5    | 263     | 0.61      | 22.7                    | 0.227     |
| 38        | -24.8   | 97.2    | 0.25      | 3.74                    | 0.227     |
| 39        | 10.1    | 326     | 0.46      | 13.1                    | 0.226     |

|    |       |      |      |      |       |
|----|-------|------|------|------|-------|
| 40 | -14.2 | 134  | 0.49 | 14.9 | 0.224 |
| 41 | 51.4  | 54.5 | 0.31 | 5.99 | 0.224 |
| 42 | 42.6  | 346  | 0.26 | 4.35 | 0.222 |
| 43 | -27.2 | 45.8 | 0.16 | 1.64 | 0.217 |
| 44 | -52.7 | 49.1 | 0.19 | 2.39 | 0.215 |
| 45 | 72.8  | 345  | 0.17 | 2.1  | 0.211 |
| 46 | -42.6 | 144  | 0.41 | 12.2 | 0.209 |
| 47 | 13.2  | 159  | 0.7  | 35.1 | 0.208 |
| 48 | 23.3  | 179  | 0.59 | 25.6 | 0.205 |
| 49 | -75.7 | 224  | 0.22 | 3.68 | 0.204 |
| 50 | 60.2  | 228  | 0.29 | 6.26 | 0.203 |
| 51 | 44.9  | 326  | 0.52 | 20.9 | 0.202 |
| 52 | 15.3  | 287  | 0.22 | 3.66 | 0.202 |
| 53 | -17.6 | 280  | 0.79 | 48.9 | 0.200 |
| 54 | -66.9 | 333  | 0.96 | 72.9 | 0.199 |
| 55 | 68.2  | 137  | 0.36 | 11.1 | 0.193 |
| 56 | -38.2 | 136  | 0.24 | 4.67 | 0.193 |
| 57 | 11.1  | 84.8 | 0.23 | 4.47 | 0.192 |
| 58 | -34.2 | 117  | 0.62 | 32.5 | 0.191 |
| 59 | -38.7 | 153  | 0.72 | 45   | 0.190 |
| 60 | -35.3 | 82.2 | 0.42 | 15.3 | 0.190 |
| 61 | -10.4 | 335  | 0.33 | 10.4 | 0.183 |
| 62 | 2.53  | 276  | 0.3  | 8.33 | 0.182 |
| 63 | -46.6 | 221  | 0.16 | 2.46 | 0.180 |
| 64 | -34.6 | 84.2 | 0.44 | 18.7 | 0.179 |
| 65 | 40.1  | 146  | 0.56 | 30.5 | 0.178 |
| 66 | -36.3 | 68.5 | 0.4  | 16.2 | 0.177 |
| 67 | 37.3  | 24.6 | 0.34 | 11.7 | 0.176 |
| 68 | -14.8 | 282  | 0.51 | 27.3 | 0.171 |
| 69 | -40.1 | 155  | 0.26 | 7.57 | 0.170 |
| 70 | -9.15 | 301  | 0.21 | 4.77 | 0.170 |
| 71 | 9.62  | 16.2 | 0.52 | 29.6 | 0.169 |
| 72 | -77.1 | 147  | 0.18 | 3.5  | 0.169 |
| 73 | -38.6 | 143  | 0.24 | 6.8  | 0.166 |
| 74 | -61   | 218  | 0.19 | 4.03 | 0.166 |
| 75 | 71.3  | 94.8 | 0.26 | 7.85 | 0.164 |
| 76 | -26.9 | 337  | 1.28 | 193  | 0.163 |
| 77 | -52   | 103  | 0.2  | 4.97 | 0.163 |
| 78 | 9.83  | 324  | 0.56 | 36.8 | 0.162 |
| 79 | -27.3 | 111  | 0.27 | 8.84 | 0.161 |

|     |       |      |      |      |       |
|-----|-------|------|------|------|-------|
| 80  | 15.9  | 9.56 | 0.39 | 18.9 | 0.160 |
| 81  | -50.5 | 282  | 0.27 | 8.58 | 0.160 |
| 82  | -65.4 | 134  | 0.15 | 2.98 | 0.158 |
| 83  | -56.3 | 55   | 0.56 | 39.8 | 0.157 |
| 84  | -23.5 | 78.2 | 0.23 | 6.82 | 0.157 |
| 85  | -54.7 | 150  | 0.47 | 28.6 | 0.156 |
| 86  | -4.61 | 245  | 0.24 | 7.43 | 0.156 |
| 87  | 48.2  | 43.9 | 0.18 | 4.22 | 0.155 |
| 88  | 41    | 51.6 | 0.36 | 16.8 | 0.154 |
| 89  | 13.7  | 335  | 0.42 | 23.7 | 0.153 |
| 90  | 42.6  | 186  | 0.37 | 18.5 | 0.151 |
| 91  | -59.9 | 84.5 | 0.35 | 16.5 | 0.151 |
| 92  | 14.1  | 191  | 0.32 | 14.2 | 0.150 |
| 93  | -22.4 | 147  | 0.41 | 23.2 | 0.149 |
| 94  | 39.8  | 15.9 | 0.26 | 9.4  | 0.148 |
| 95  | -35.2 | 70.3 | 0.85 | 105  | 0.147 |
| 96  | 65.4  | 231  | 0.43 | 27   | 0.146 |
| 97  | -64   | 136  | 0.28 | 11.4 | 0.146 |
| 98  | 24.4  | 87.9 | 0.35 | 18.1 | 0.144 |
| 99  | -39.1 | 204  | 0.39 | 23.8 | 0.143 |
| 100 | 53    | 5.85 | 0.34 | 18.1 | 0.142 |
| 101 | -3.24 | 5.44 | 0.2  | 6.35 | 0.142 |
| 102 | 1.18  | 22.7 | 0.31 | 15.6 | 0.141 |
| 103 | -50.3 | 9.33 | 0.18 | 4.82 | 0.141 |
| 104 | 16.3  | 314  | 0.34 | 18.9 | 0.140 |
| 105 | 51.6  | 177  | 0.23 | 8.45 | 0.139 |
| 106 | -11.1 | 330  | 0.17 | 4.8  | 0.139 |
| 107 | 15.6  | 21.9 | 0.66 | 70.7 | 0.138 |
| 108 | 57.3  | 233  | 0.51 | 42.6 | 0.137 |
| 109 | 41.9  | 303  | 0.32 | 16.8 | 0.137 |
| 110 | -61   | 349  | 1.84 | 587  | 0.134 |
| 111 | 34.1  | 214  | 0.18 | 5.61 | 0.133 |
| 112 | 75.8  | 103  | 0.21 | 7.92 | 0.131 |
| 113 | 24.8  | 1.69 | 0.35 | 23.4 | 0.128 |
| 114 | -40.4 | 53.9 | 0.19 | 6.55 | 0.128 |
| 115 | -63.4 | 318  | 0.18 | 6.4  | 0.128 |
| 116 | -38.3 | 41.1 | 0.18 | 5.95 | 0.127 |
| 117 | -64.2 | 302  | 0.43 | 37.8 | 0.125 |
| 118 | 6.25  | 174  | 0.41 | 33.1 | 0.125 |
| 119 | 73.9  | 135  | 0.19 | 7.2  | 0.125 |

|     |       |      |      |      |       |
|-----|-------|------|------|------|-------|
| 120 | 6.68  | 155  | 0.22 | 9.51 | 0.124 |
| 121 | 35.6  | 99.7 | 0.41 | 35.9 | 0.122 |
| 122 | 8.63  | 133  | 0.35 | 26.5 | 0.122 |
| 123 | 32.4  | 209  | 0.27 | 15.9 | 0.122 |
| 124 | -3.23 | 203  | 0.34 | 25   | 0.121 |
| 125 | -27.4 | 228  | 0.19 | 7.72 | 0.121 |
| 126 | -64.2 | 351  | 0.16 | 5.58 | 0.121 |
| 127 | -35.1 | 108  | 0.28 | 17.4 | 0.120 |
| 128 | 71.9  | 98.9 | 0.17 | 5.95 | 0.120 |
| 129 | 20    | 165  | 0.41 | 37.6 | 0.119 |
| 130 | -58.9 | 184  | 0.16 | 5.76 | 0.119 |
| 131 | -27.4 | 286  | 0.23 | 12   | 0.116 |
| 132 | 60.5  | 330  | 0.18 | 7.27 | 0.116 |
| 133 | -26.9 | 133  | 0.16 | 5.98 | 0.116 |
| 134 | -29   | 144  | 0.15 | 5.35 | 0.116 |
| 135 | 17.9  | 273  | 0.22 | 11.9 | 0.115 |
| 136 | 21.8  | 93.6 | 0.19 | 8.87 | 0.115 |
| 137 | -50.1 | 136  | 0.73 | 129  | 0.114 |
| 138 | 32.1  | 36.8 | 0.26 | 16.7 | 0.114 |
| 139 | -61.4 | 12.5 | 0.43 | 45   | 0.113 |
| 140 | 75.6  | 109  | 0.37 | 33.4 | 0.113 |
| 141 | -20.4 | 208  | 0.3  | 22.8 | 0.113 |
| 142 | -50.2 | 27.8 | 0.16 | 5.94 | 0.113 |
| 143 | -17.1 | 223  | 0.41 | 42.4 | 0.112 |
| 144 | -28.2 | 289  | 0.29 | 20.9 | 0.112 |
| 145 | 12.6  | 163  | 0.21 | 10.9 | 0.112 |
| 146 | -47.5 | 180  | 0.22 | 12.9 | 0.111 |
| 147 | -39   | 62   | 0.34 | 30.3 | 0.110 |
| 148 | -48.1 | 225  | 0.18 | 8.63 | 0.109 |
| 149 | -52.9 | 89.1 | 0.4  | 44.1 | 0.108 |
| 150 | -29   | 288  | 0.22 | 13.4 | 0.108 |
| 151 | 49.7  | 123  | 0.77 | 161  | 0.107 |
| 152 | 9.01  | 11.1 | 0.43 | 50.8 | 0.107 |
| 153 | -30   | 134  | 0.19 | 9.68 | 0.107 |
| 154 | -0.58 | 323  | 0.17 | 8.23 | 0.107 |
| 155 | 19.2  | 160  | 0.17 | 7.87 | 0.107 |
| 156 | 12.7  | 12.6 | 0.34 | 32.1 | 0.106 |
| 157 | -69   | 262  | 0.26 | 19.3 | 0.106 |
| 158 | 10    | 13.8 | 0.21 | 12.6 | 0.106 |
| 159 | -40.5 | 32   | 0.3  | 27   | 0.102 |

|     |       |      |      |      |       |
|-----|-------|------|------|------|-------|
| 160 | 41.8  | 45.4 | 0.22 | 14.1 | 0.102 |
| 161 | 38.4  | 330  | 0.39 | 45.8 | 0.101 |
| 162 | -26.1 | 215  | 0.16 | 7.89 | 0.101 |
| 163 | 10.7  | 322  | 0.25 | 19   | 0.100 |
| 164 | -23.2 | 123  | 0.37 | 43.1 | 0.100 |
| 165 | 4.56  | 302  | 0.32 | 33.5 | 0.099 |
| 166 | 54.6  | 354  | 0.15 | 7.52 | 0.099 |
| 167 | -31.2 | 147  | 0.21 | 13.6 | 0.099 |
| 168 | -73.7 | 97   | 0.19 | 11.1 | 0.098 |
| 169 | 52    | 50.6 | 0.38 | 47.1 | 0.097 |
| 170 | -32.4 | 261  | 0.31 | 31.1 | 0.097 |
| 171 | 32.7  | 211  | 0.3  | 30.7 | 0.097 |
| 172 | 41.3  | 166  | 0.42 | 57.9 | 0.097 |
| 173 | -67.8 | 308  | 0.15 | 7.57 | 0.097 |
| 174 | -32.3 | 284  | 0.22 | 15.9 | 0.096 |
| 175 | -55.2 | 9.17 | 0.23 | 17.6 | 0.096 |
| 176 | 63.1  | 21   | 0.4  | 56   | 0.095 |
| 177 | -33.6 | 128  | 0.21 | 15.1 | 0.095 |
| 178 | -52.7 | 299  | 0.25 | 22.1 | 0.094 |
| 179 | -60.7 | 66.2 | 0.16 | 9.58 | 0.094 |
| 180 | -30.6 | 154  | 0.15 | 8.27 | 0.094 |
| 181 | 10.2  | 169  | 0.19 | 13.3 | 0.094 |
| 182 | 10.9  | 11.1 | 0.21 | 15.5 | 0.093 |
| 183 | 27.6  | 146  | 0.45 | 74.5 | 0.093 |
| 184 | -39.1 | 157  | 0.18 | 12.1 | 0.093 |
| 185 | -27.6 | 268  | 0.31 | 37.4 | 0.090 |
| 186 | -28.8 | 306  | 0.18 | 13.4 | 0.089 |
| 187 | 31.9  | 150  | 0.29 | 33.6 | 0.089 |
| 188 | -7.02 | 223  | 0.18 | 13.5 | 0.088 |
| 189 | -1.56 | 335  | 0.21 | 17.9 | 0.088 |
| 190 | -47.9 | 42.4 | 0.19 | 14.2 | 0.088 |
| 191 | 27.7  | 278  | 0.26 | 27.4 | 0.088 |
| 192 | 38.7  | 238  | 0.19 | 15.1 | 0.087 |
| 193 | 24.5  | 21   | 0.29 | 36.4 | 0.085 |
| 194 | 35.3  | 192  | 0.15 | 10.5 | 0.085 |
| 195 | 3.4   | 27.9 | 0.22 | 21.4 | 0.084 |
| 196 | 18.9  | 18.4 | 1.18 | 625  | 0.083 |
| 197 | 7.64  | 120  | 0.16 | 11.8 | 0.082 |
| 198 | -33.1 | 121  | 0.17 | 13.5 | 0.081 |
| 199 | 63.1  | 27.6 | 0.44 | 96   | 0.080 |

|     |       |      |      |      |       |
|-----|-------|------|------|------|-------|
| 200 | -19.7 | 146  | 0.25 | 29.6 | 0.080 |
| 201 | -18.5 | 239  | 0.41 | 82.6 | 0.079 |
| 202 | 25.6  | 167  | 0.23 | 25.7 | 0.079 |
| 203 | 6.81  | 321  | 0.21 | 23   | 0.079 |
| 204 | -22.1 | 236  | 0.25 | 32   | 0.079 |
| 205 | 42.6  | 127  | 1.08 | 601  | 0.078 |
| 206 | -60.3 | 159  | 0.19 | 18   | 0.078 |
| 207 | 46.6  | 103  | 0.19 | 19.9 | 0.077 |
| 208 | -80.3 | 134  | 0.19 | 19.6 | 0.077 |
| 209 | -4.15 | 162  | 0.21 | 24.8 | 0.076 |
| 210 | -23   | 93.2 | 0.16 | 13.2 | 0.076 |
| 211 | -23.2 | 76   | 0.21 | 23.8 | 0.076 |
| 212 | 42.3  | 271  | 0.19 | 21   | 0.075 |
| 213 | 22.5  | 317  | 0.15 | 13.6 | 0.074 |
| 214 | 4.01  | 310  | 0.58 | 194  | 0.074 |
| 215 | 15    | 233  | 0.17 | 16.5 | 0.073 |
| 216 | 20.2  | 26.3 | 0.19 | 21.8 | 0.073 |
| 217 | 24.7  | 189  | 0.38 | 86.8 | 0.072 |
| 218 | -1.57 | 186  | 0.19 | 22   | 0.072 |
| 219 | -39.2 | 305  | 0.22 | 28.5 | 0.072 |
| 220 | 4.03  | 291  | 0.2  | 26.5 | 0.070 |
| 221 | 67.6  | 273  | 0.21 | 27.9 | 0.069 |
| 222 | -7.71 | 32.2 | 0.24 | 39.5 | 0.069 |
| 223 | 58.9  | 127  | 0.22 | 32.3 | 0.069 |
| 224 | -33.9 | 302  | 0.16 | 17   | 0.069 |
| 225 | -12.8 | 11.6 | 0.19 | 24.6 | 0.068 |
| 226 | -33.8 | 270  | 0.76 | 396  | 0.068 |
| 227 | 24.4  | 138  | 0.28 | 55.8 | 0.068 |
| 228 | 76    | 96.4 | 0.2  | 27.4 | 0.067 |
| 229 | 8.35  | 22.2 | 0.22 | 33.1 | 0.066 |
| 230 | -34.8 | 273  | 0.17 | 19.9 | 0.066 |
| 231 | 60.3  | 211  | 0.2  | 28.8 | 0.066 |
| 232 | 44.2  | 121  | 0.27 | 53.1 | 0.065 |
| 233 | 38.8  | 318  | 0.21 | 33.3 | 0.065 |
| 234 | 11.9  | 124  | 0.27 | 54   | 0.064 |
| 235 | 48.6  | 132  | 0.17 | 22.4 | 0.064 |
| 236 | 43.6  | 343  | 0.2  | 31   | 0.063 |
| 237 | -17.2 | 63.9 | 0.17 | 22.6 | 0.063 |
| 238 | -44.4 | 291  | 0.2  | 34.2 | 0.060 |
| 239 | -45.5 | 127  | 1.52 | 2060 | 0.059 |

|     |       |      |      |      |       |
|-----|-------|------|------|------|-------|
| 240 | 57.5  | 242  | 0.23 | 48.8 | 0.059 |
| 241 | 7.8   | 307  | 0.29 | 80   | 0.057 |
| 242 | 32.1  | 110  | 0.16 | 27.4 | 0.056 |
| 243 | -29.3 | 264  | 0.26 | 71.9 | 0.055 |
| 244 | -38.6 | 262  | 0.68 | 516  | 0.053 |
| 245 | -10.4 | 260  | 0.49 | 266  | 0.053 |
| 246 | -19.6 | 78.6 | 0.22 | 53.6 | 0.053 |
| 247 | 52.2  | 344  | 0.29 | 96.7 | 0.052 |
| 248 | 21.3  | 143  | 0.21 | 50.1 | 0.052 |
| 249 | -26.8 | 261  | 0.16 | 29.4 | 0.051 |
| 250 | -83.3 | 202  | 0.75 | 680  | 0.051 |
| 251 | 38.5  | 150  | 0.2  | 50.9 | 0.050 |
| 252 | 57.6  | 171  | 0.2  | 53.1 | 0.049 |
| 253 | 25.1  | 358  | 0.39 | 207  | 0.048 |
| 254 | 24.2  | 156  | 0.22 | 73.8 | 0.045 |
| 255 | 5.44  | 38.8 | 0.18 | 57   | 0.043 |
| 256 | 15.2  | 146  | 0.16 | 47.1 | 0.041 |
| 257 | -21.8 | 273  | 0.16 | 51.9 | 0.040 |
| 258 | -52.9 | 170  | 0.31 | 223  | 0.037 |

---
